# Supplementary material for: Simulation-Based Education of Health Workers in Low- and Middle-Income Countries: A Systematic Review
Source: PubMed Central journal article supplement (PMC11666082; doi:10.9745/ghsp-d-24-00187), 2024-12-20
Supplement: GHSP-D-24-00187-Supplement.pdf [file GHSP-D-24-00187-Supplement.pdf]

**SUPPLEMENT 1. Ovid Medline search strategy for simulation-based education in low- and middle-income countries**

| #  | Search string                                                                                                                                                                                                                                                                                                                                                                                                                                                                                                                                                                                                                                                                                                                                                                                                                                                                                                                                                                                                                                                                                                                                                                                                                                                                                                                                                                                                                                                                                                                                                                                                                                                                                                             | # of results |
|----|---------------------------------------------------------------------------------------------------------------------------------------------------------------------------------------------------------------------------------------------------------------------------------------------------------------------------------------------------------------------------------------------------------------------------------------------------------------------------------------------------------------------------------------------------------------------------------------------------------------------------------------------------------------------------------------------------------------------------------------------------------------------------------------------------------------------------------------------------------------------------------------------------------------------------------------------------------------------------------------------------------------------------------------------------------------------------------------------------------------------------------------------------------------------------------------------------------------------------------------------------------------------------------------------------------------------------------------------------------------------------------------------------------------------------------------------------------------------------------------------------------------------------------------------------------------------------------------------------------------------------------------------------------------------------------------------------------------------------|--------------|
| 1  | exp Simulation Training/ or exp Educational Technology/ or Role Playing/                                                                                                                                                                                                                                                                                                                                                                                                                                                                                                                                                                                                                                                                                                                                                                                                                                                                                                                                                                                                                                                                                                                                                                                                                                                                                                                                                                                                                                                                                                                                                                                                                                                  | 124710       |
| 2  | ((Simulat* or scenario*) adj5 (educat* or learn* or teach* or train* or practice or practise or instruct* or course or workshop)) or (SBE or SBME or simulation based)).mp.                                                                                                                                                                                                                                                                                                                                                                                                                                                                                                                                                                                                                                                                                                                                                                                                                                                                                                                                                                                                                                                                                                                                                                                                                                                                                                                                                                                                                                                                                                                                               | 27027        |
| 3  | (roleplay or role play or manikin or mannikin or mannequin or part task trainer or partial task trainer or bench trainer or laparoscop* trainer or bench model or laparoscop* model).mp.                                                                                                                                                                                                                                                                                                                                                                                                                                                                                                                                                                                                                                                                                                                                                                                                                                                                                                                                                                                                                                                                                                                                                                                                                                                                                                                                                                                                                                                                                                                                  | 5828         |
| 4  | Virtual reality/ or Augmented reality/ or Computer simulation/ or User computer interface/ or Clinical competence/ or Laparoscopy/ or Education, Distance/                                                                                                                                                                                                                                                                                                                                                                                                                                                                                                                                                                                                                                                                                                                                                                                                                                                                                                                                                                                                                                                                                                                                                                                                                                                                                                                                                                                                                                                                                                                                                                | 436177       |
| 5  | (virtual reality or augment* reality or interactive learning or learning interactive or acting or distance education or virtual education or remote education).mp.                                                                                                                                                                                                                                                                                                                                                                                                                                                                                                                                                                                                                                                                                                                                                                                                                                                                                                                                                                                                                                                                                                                                                                                                                                                                                                                                                                                                                                                                                                                                                        | 190461       |
| 6  | exp Simulation Training/ or (educat* or learn* or teach* or train* or practice or practise or instruct* or course or workshop or simulat*).mp.                                                                                                                                                                                                                                                                                                                                                                                                                                                                                                                                                                                                                                                                                                                                                                                                                                                                                                                                                                                                                                                                                                                                                                                                                                                                                                                                                                                                                                                                                                                                                                            | 3570147      |
| 7  | (4 or 5) and 6                                                                                                                                                                                                                                                                                                                                                                                                                                                                                                                                                                                                                                                                                                                                                                                                                                                                                                                                                                                                                                                                                                                                                                                                                                                                                                                                                                                                                                                                                                                                                                                                                                                                                                            | 334290       |
| 8  | Exp Emergency Treatment/ or exp Emergencies/                                                                                                                                                                                                                                                                                                                                                                                                                                                                                                                                                                                                                                                                                                                                                                                                                                                                                                                                                                                                                                                                                                                                                                                                                                                                                                                                                                                                                                                                                                                                                                                                                                                                              | 168376       |
| 9  | 6 and 8                                                                                                                                                                                                                                                                                                                                                                                                                                                                                                                                                                                                                                                                                                                                                                                                                                                                                                                                                                                                                                                                                                                                                                                                                                                                                                                                                                                                                                                                                                                                                                                                                                                                                                                   | 33709        |
| 10 | ((resuscit* or emergency or trauma* or CPR or ALS or APLS or life support) adj5 (educat* or learn* or teach* or train* or practice or practise or instruct* or course or workshop or simulat*)).mp.                                                                                                                                                                                                                                                                                                                                                                                                                                                                                                                                                                                                                                                                                                                                                                                                                                                                                                                                                                                                                                                                                                                                                                                                                                                                                                                                                                                                                                                                                                                       | 23958        |
| 11 | 1 or 2 or 3 or 7 or 9 or 10                                                                                                                                                                                                                                                                                                                                                                                                                                                                                                                                                                                                                                                                                                                                                                                                                                                                                                                                                                                                                                                                                                                                                                                                                                                                                                                                                                                                                                                                                                                                                                                                                                                                                               | 497291       |
| 12 | Developing Countries/ or Global Health/ or Health Equity/                                                                                                                                                                                                                                                                                                                                                                                                                                                                                                                                                                                                                                                                                                                                                                                                                                                                                                                                                                                                                                                                                                                                                                                                                                                                                                                                                                                                                                                                                                                                                                                                                                                                 | 128863       |
| 13 | (Deprived Countries or Deprived Population or Deprived Populations or Developing Countries or Developing Country or Developing Economies or Developing Economy or Developing Nation or Developing Nations or Developing Population or Developing Populations or Developing World or LAMI Countries or LAMI Country or Less Developed Countries or Less Developed Country or Less Developed Economies or Less Developed Nation or Less Developed Nations or Less Developed World or Lesser Developed Countries or Lesser Developed Nations or LMIC or LMICS or Low GDP or Low GNP or Low Gross Domestic or Low Gross National or Low Income Countries or Low Income Country or Low Income Economies or Low Income Economy or Low Income Nations or Low Income Population or Low Income Populations or Lower GDP or lower gross domestic or Lower Income Countries or Lower Income Country or Lower Income Nations or Lower Income Population or Lower Income Populations or Middle Income Countries or Middle Income Country or Middle Income Economies or Middle Income Nation or Middle Income Nations or Middle Income Population or Middle Income Populations or Poor Countries or Poor Country or Poor Economies or Poor Economy or Poor Nation or Poor Nations or Poor Population or Poor Populations or poor world or Poorer Countries or Poorer Economies or Poorer Economy or Poorer Nations or Poorer Population or Poorer Populations or Third World or Transitional Countries or Transitional Country or Transitional Economies or Transitional Economy or Under Developed Countries or Under Developed Country or under developed nations or Under Developed World or Under Served Population or Under Served | 129359       |

**Supplement to:** Robinson SJA, Ritchie AMA, Pacilli M, Nestel D, McLeod E, Nataraja RM. Simulation-based education of health workers in low- and middle-income countries: a systematic review. *Glob Health Sci Pract.* 2024;12(6):e2400187. <https://doi.org/10.9745/GHSP-D-24-000187>

|    |                                                                                                                                                                                                                                                                                                                                                                                                                                                                                                                                                                                                                                                                                                                                                                                                                                                                                                                                                                                                                                                                                                                                                                                                                                                                                                                                                                                                                                                                                                                                                                                                                                                                                                                                                                                                                                                                                                                                                                                                                                                                                                                        |         |
|----|------------------------------------------------------------------------------------------------------------------------------------------------------------------------------------------------------------------------------------------------------------------------------------------------------------------------------------------------------------------------------------------------------------------------------------------------------------------------------------------------------------------------------------------------------------------------------------------------------------------------------------------------------------------------------------------------------------------------------------------------------------------------------------------------------------------------------------------------------------------------------------------------------------------------------------------------------------------------------------------------------------------------------------------------------------------------------------------------------------------------------------------------------------------------------------------------------------------------------------------------------------------------------------------------------------------------------------------------------------------------------------------------------------------------------------------------------------------------------------------------------------------------------------------------------------------------------------------------------------------------------------------------------------------------------------------------------------------------------------------------------------------------------------------------------------------------------------------------------------------------------------------------------------------------------------------------------------------------------------------------------------------------------------------------------------------------------------------------------------------------|---------|
|    | Populations or Underdeveloped Countries or Underdeveloped Country or underdeveloped economies or underdeveloped nations or underdeveloped population or Underdeveloped World or Underserved Countries or Underserved Nations or Underserved Population or Underserved Populations).ti,ab,kw.                                                                                                                                                                                                                                                                                                                                                                                                                                                                                                                                                                                                                                                                                                                                                                                                                                                                                                                                                                                                                                                                                                                                                                                                                                                                                                                                                                                                                                                                                                                                                                                                                                                                                                                                                                                                                           |         |
| 14 | ((Resource limited or Low resource) and (Countr* or Nation* or Setting* or Context* or Population* or Econom*)).ti,ab,kw.                                                                                                                                                                                                                                                                                                                                                                                                                                                                                                                                                                                                                                                                                                                                                                                                                                                                                                                                                                                                                                                                                                                                                                                                                                                                                                                                                                                                                                                                                                                                                                                                                                                                                                                                                                                                                                                                                                                                                                                              | 13018   |
| 15 | (Afghanistan or Albania or Algeria or American Samoa or Angola or Argentina or Armenia or Azerbaijan or Bangladesh or Belarus or Belize or Benin or Bhutan or Bolivia or (Bosnia and Herzegovina) or Botswana or Brazil or Bulgaria or Burkina Faso or Burundi or Cabo Verde or Cambodia or Cameroon or Central African Republic or Chad or China or Colombia or Comoros or Congo Dem Rep or Congo Rep or Costa Rica or C*te d*Ivoire or Cuba or Djibouti or Dominica or Dominican Republic or Ecuador or Egypt or Arab Republic of Egypt or Egypt Arab Rep or El Salvador or Equatorial Guinea or Eritrea or Eswatini or Ethiopia or Fiji or Gabon or Gambia or The Gambia or Republic of The Gambia or Georgia or Ghana or Grenada or Guatemala or Guinea or Guinea-Bissau or Guyana or Haiti or Honduras or India or Indonesia or Iran or Islamic Republic of Iran or Iraq or Jamaica or Jamaica or Jordan or Kazakhstan or Kenya or Kiribati or North Korea or Korea Dem People*s Rep or Kosovo or Kyrgyzstan or Kyrgyz Republic or Laos or Lao PDR or Lao People*s Democratic Republic Lebanon or Lesotho or Liberia or Libya or Madagascar or Malawi or Malaysia or Maldives or Mali or Marshall Islands or Mauritania or Mauritius or Mexico or Micronesia Fed Sts or Moldova or Mongolia or Montenegro or Morocco or Mozambique or Myanmar or Namibia or Nepal or Nicaragua or Niger or Nigeria or North Macedonia or Pakistan or Panama or Papua New Guinea or Paraguay or Peru or Philippines or Romania or Russia or Russian Federation or Rwanda or Samoa or (S*o Tom* and Principe) or Senegal or Serbia or Sierra Leone or Solomon Islands or Somalia or South Africa or South Sudan or Sri Lanka or St Lucia or (St Vincent and the Grenadines) or Sudan or Suriname or Syria or Syrian Arab Republic or Tajikistan or Tanzania or Thailand or Timor Leste or Togo or Tonga or Tunisia or Turkey or Turkmenistan or Tuvalu or Uganda or Ukraine or Uzbekistan or Vanuatu or Venezuela or Venezuela RB or Vietnam or (West Bank and Gaza) or Yemen or Republic of Yemen or Zambia or Zimbabwe).ti,ab,kw. | 1008512 |
| 16 | 12 or 13 or 14 or 15                                                                                                                                                                                                                                                                                                                                                                                                                                                                                                                                                                                                                                                                                                                                                                                                                                                                                                                                                                                                                                                                                                                                                                                                                                                                                                                                                                                                                                                                                                                                                                                                                                                                                                                                                                                                                                                                                                                                                                                                                                                                                                   | 1143003 |
| 17 | (health* or medical or surg*).mp. or exp Health Personnel/ or exp Health occupations/ or exp Students, Health occupations/ or exp Education, Professional/ or exp Health Care Sector/                                                                                                                                                                                                                                                                                                                                                                                                                                                                                                                                                                                                                                                                                                                                                                                                                                                                                                                                                                                                                                                                                                                                                                                                                                                                                                                                                                                                                                                                                                                                                                                                                                                                                                                                                                                                                                                                                                                                  | 8547884 |
| 18 | 11 and 16 and 17                                                                                                                                                                                                                                                                                                                                                                                                                                                                                                                                                                                                                                                                                                                                                                                                                                                                                                                                                                                                                                                                                                                                                                                                                                                                                                                                                                                                                                                                                                                                                                                                                                                                                                                                                                                                                                                                                                                                                                                                                                                                                                       | 11308   |
| 19 | limit 18 to (english language and yr="2002 -Current")                                                                                                                                                                                                                                                                                                                                                                                                                                                                                                                                                                                                                                                                                                                                                                                                                                                                                                                                                                                                                                                                                                                                                                                                                                                                                                                                                                                                                                                                                                                                                                                                                                                                                                                                                                                                                                                                                                                                                                                                                                                                  | 9559    |

**Supplement to:** Robinson SJA, Ritchie AMA, Pacilli M, Nestel D, McLeod E, Nataraja RM. Simulation-based education of health workers in low- and middle-income countries: a systematic review. *Glob Health Sci Pract.* 2024;12(6):e2400187. <https://doi.org/10.9745/GHSP-D-24-000187>

## SUPPLEMENT 2. List of included studies in a systematic review of simulation-based education programs in low- and middle-income countries evaluating at Level 4 of the Kirkpatrick model

Note: References are displayed in the alphabetical order of author names. The numbering of references matches that of the main text.

| Author                     | Year | Country/Setting                                                                                         | Use of simulation-based education | Program Type | Learning Population/s                                   | Simulation Modalities                                                  | Educational Focus                                                 | Statistically Significant Improvement in Results | Kirkpatrick Levels Evaluated (in Addition to Level 4) | Risk of bias / Quality Assessment Outcome |
|----------------------------|------|---------------------------------------------------------------------------------------------------------|-----------------------------------|--------------|---------------------------------------------------------|------------------------------------------------------------------------|-------------------------------------------------------------------|--------------------------------------------------|-------------------------------------------------------|-------------------------------------------|
| Afulani <sup>51</sup>      | 2019 | Ghana                                                                                                   | Educational program               | Standardized | Midwives, Doctors, Nurses                               | Role-play, Scenario-based, Mannequin, Synthetic PTT, Hybrid simulation | Neonatology; Obstetrics; Communication/ leadership/ team training | Yes                                              | None                                                  | Good                                      |
| Arabi <sup>76</sup>        | 2018 | Sudan                                                                                                   | Educational program               | Standardized | Midwives                                                | Scenario-based, Mannequin                                              | Neonatology; Obstetrics                                           | Yes                                              | Level 3                                               | Good                                      |
| Arreola-Risa <sup>77</sup> | 2004 | Mexico                                                                                                  | Educational program               | Standardized | Unspecified health workers                              | Mannequin, Animal PTT                                                  | Acute/critical care                                               | Partially                                        | Level 3                                               | Fair                                      |
| Aziz <sup>78</sup>         | 2020 | China                                                                                                   | Educational program               | Standardized | Doctors, Nurses                                         | Scenario-based                                                         | Neonatology                                                       | No                                               | Level 3                                               | Fair                                      |
| Baumgartner <sup>79</sup>  | 2021 | Uganda                                                                                                  | Educational program               | Independent  | Unspecified health workers                              | Mannequin                                                              | Neonatology; Obstetrics                                           | NA                                               | Level 3                                               | Fair                                      |
| Bellad <sup>48</sup>       | 2016 | 1. India<br>2. Kenya                                                                                    | Educational program               | Standardized | Unspecified health workers                              | Scenario-based, Mannequin                                              | Neonatology                                                       | Partially                                        | None                                                  | Good                                      |
| Bender <sup>80</sup>       | 2016 | Kosovo                                                                                                  | Educational program               | Standardized | Doctors, Nurses                                         | Scenario-based                                                         | Neonatology                                                       | Partially                                        | None                                                  | Fair                                      |
| Brathwaite <sup>81</sup>   | 2020 | Ghana                                                                                                   | Educational program               | Standardized | Doctors, Nurses, Midwives                               | Role-play, Scenario-based, Mannequin                                   | Neonatology                                                       | Partially                                        | Level 2; Level 3                                      | Fair                                      |
| Carlo <sup>82</sup>        | 2010 | 1. Argentina<br>2. Democratic Republic of Congo<br>3. Guatemala<br>4. India<br>5. Pakistan<br>6. Zambia | Educational program               | Standardized | Traditional Birth Attendants, Nurses, Midwives, Doctors | Role-play, Scenario-based                                              | Neonatology                                                       | Partially                                        | Level 2; Level 3                                      | Poor                                      |
| Carvalho <sup>83</sup>     | 2019 | Brazil                                                                                                  | Educational program               | Independent  | Doctors, Nurses                                         | Scenario-based, Mannequin                                              | Other: Neurology                                                  | No                                               | Level 3                                               | Good                                      |
| Chan <sup>63</sup>         | 2020 | Kazakhstan                                                                                              | Broader intervention/initiative   | Independent  | Unspecified health workers                              | Role-play                                                              | Other: Cardiology                                                 | Partially                                        | Level 3                                               | Good                                      |

**Supplement to:** Robinson SJA, Ritchie AMA, Pacilli M, Nestel D, McLeod E, Nataraja RM. Simulation-based education of health workers in low- and middle-income countries: a systematic review. *Glob Health Sci Pract.* 2024;12(6):e2400187. <https://doi.org/10.9745/GHSP-D-24-000187>

| Author                     | Year | Country/Setting                                                                 | Use of simulation-based education | Program Type | Learning Population/s                    | Simulation Modalities                         | Educational Focus                                                 | Statistically Significant Improvement in Results | Kirkpatrick Levels Evaluated (in Addition to Level 4) | Risk of bias / Quality Assessment Outcome |
|----------------------------|------|---------------------------------------------------------------------------------|-----------------------------------|--------------|------------------------------------------|-----------------------------------------------|-------------------------------------------------------------------|--------------------------------------------------|-------------------------------------------------------|-------------------------------------------|
| Chang <sup>84</sup>        | 2019 | Malawi                                                                          | Broader intervention/initiative   | Standardized | Doctors, Nurses, Midwives                | Scenario-based                                | Neonatology; Obstetrics; Communication/ leadership/ team training | Partially                                        | Level 3                                               | Good                                      |
| Charafeddine <sup>85</sup> | 2016 | Lebanon                                                                         | Educational program               | Standardized | Doctors, Nurses, Midwives, Allied health | Scenario-based, Mannequin                     | Neonatology                                                       | Partially                                        | Level 1; Level 2                                      | Fair                                      |
| Charyeva <sup>86</sup>     | 2015 | Nigeria                                                                         | Educational program               | Independent  | Other                                    | Synthetic PTT                                 | Family planning                                                   | Partially                                        | Level 3                                               | Fair                                      |
| Cioe-Pena <sup>87</sup>    | 2017 | El Salvador                                                                     | Broader intervention/initiative   | Standardized | Doctors, Nurses                          | Unspecified simulation modality               | Acute/critical care                                               | No                                               | Level 2; Level 3                                      | Fair                                      |
| Clark <sup>88</sup>        | 2012 | Sierra Leone                                                                    | Broader intervention/initiative   | Standardized | Nurses                                   | Role-play, Scenario-based                     | Acute/critical care                                               | Yes                                              | None                                                  | Fair                                      |
| Crofts <sup>57</sup>       | 2015 | Zimbabwe                                                                        | Educational program               | Standardized | Doctors, Nurses, Midwives, Allied health | Scenario-based, Mannequin, Synthetic PTT      | Obstetrics                                                        | NA                                               | Level 3                                               | Good                                      |
| Cummings <sup>89</sup>     | 2017 | Uganda                                                                          | Broader intervention/initiative   | Independent  | Unspecified health workers               | Unspecified simulation modality               | Other: Diagnosis of severe illness                                | No                                               | Level 3                                               | Fair                                      |
| Das <sup>90</sup>          | 2022 | Bangladesh                                                                      | Educational program               | Standardized | Nurses, Midwives, Allied health          | Scenario-based, Mannequin, In-situ simulation | Neonatology; Communication/ leadership/ team training             | NA                                               | None                                                  | Poor                                      |
| Das <sup>91</sup>          | 2019 | India                                                                           | Broader intervention/initiative   | Standardized | Doctors, Nurses, Nurse/midwives          | Mannequin                                     | Neonatology; Obstetrics                                           | Partially                                        | Level 1; Level 2; Level 3                             | Good                                      |
| Dean <sup>61</sup>         | 2021 | 1. Kenya<br>2. Tanzania<br>3. Uganda<br>4. Zimbabwe<br>3. Uganda<br>4. Zimbabwe | Educational program               | Independent  | Doctors                                  | Synthetic PTT                                 | Surgery (Ophthalmology)                                           | Yes                                              | Level 2; Level 3                                      | Low                                       |

**Supplement to:** Robinson SJA, Ritchie AMA, Pacilli M, Nestel D, McLeod E, Nataraja RM. Simulation-based education of health workers in low- and middle-income countries: a systematic review. *Glob Health Sci Pract.* 2024;12(6):e2400187. <https://doi.org/10.9745/GHSP-D-24-000187>

| Author                 | Year | Country/Setting                                           | Use of simulation-based education | Program Type | Learning Population/s                  | Simulation Modalities                                                                                              | Educational Focus                                                 | Statistically Significant Improvement in Results | Kirkpatrick Levels Evaluated (in Addition to Level 4) | Risk of bias / Quality Assessment Outcome |
|------------------------|------|-----------------------------------------------------------|-----------------------------------|--------------|----------------------------------------|--------------------------------------------------------------------------------------------------------------------|-------------------------------------------------------------------|--------------------------------------------------|-------------------------------------------------------|-------------------------------------------|
| De Melo <sup>92</sup>  | 2021 | Brazil                                                    | Educational program               | Independent  | Doctors                                | Simulated/standardized patients/participants, Scenario-based, Synthetic PTT, Hybrid simulation, In-situ simulation | Obstetrics                                                        | No                                               | Level 3                                               | Fair                                      |
| Dresang <sup>58</sup>  | 2015 | 1. Colombia<br>2. Guatemala<br>3. Honduras<br>4. Tanzania | Educational program               | Standardized | Doctors, Nurses, Nurse/midwives, Other | Scenario-based, Mannequin                                                                                          | Obstetrics                                                        | Partially                                        | Level 2; Level 3                                      | Fair                                      |
| Dumont <sup>93</sup>   | 2013 | 1. Senegal<br>2. Mali                                     | Broader intervention/initiative   | Standardized | Doctors, Midwives                      | Scenario-based                                                                                                     | Obstetrics                                                        | Partially                                        | Level 3                                               | Some concerns                             |
| Egenberg <sup>56</sup> | 2017 | Tanzania                                                  | Educational program               | Standardized | Nurses, Midwives, Doctors, Other       | Role-play, Scenario-based, Mannequin, Synthetic PTT, Hybrid simulation                                             | Neonatology; Obstetrics                                           | Partially                                        | Level 3                                               | Good                                      |
| Ellard <sup>94</sup>   | 2016 | Tanzania                                                  | Educational program               | Independent  | Clinical Officers, Nurse/midwives      | Unspecified simulation modality                                                                                    | Neonatology; Obstetrics; Communication/ leadership/ team training | No                                               | Level 1; Level 2; Level 3                             | Fair                                      |
| Evans <sup>95</sup>    | 2018 | Uganda                                                    | Educational program               | Standardized | Unspecified health workers             | Scenario-based, Mannequin                                                                                          | Neonatology; Obstetrics; Communication/ leadership/ team training | Partially                                        | Level 2; Level 3                                      | Some concerns                             |
| Fikree <sup>96</sup>   | 2020 | Ethiopia                                                  | Broader intervention/initiative   | Independent  | Unspecified health workers             | Synthetic PTT                                                                                                      | Family planning                                                   | Partially                                        | Level 3                                               | Poor                                      |

**Supplement to:** Robinson SJA, Ritchie AMA, Pacilli M, Nestel D, McLeod E, Nataraja RM. Simulation-based education of health workers in low- and middle-income countries: a systematic review. *Glob Health Sci Pract.* 2024;12(6):e2400187. <https://doi.org/10.9745/GHSP-D-24-000187>

| Author                     | Year | Country/Setting | Use of simulation-based education | Program Type | Learning Population/s                                          | Simulation Modalities                               | Educational Focus       | Statistically Significant Improvement in Results | Kirkpatrick Levels Evaluated (in Addition to Level 4) | Risk of bias / Quality Assessment Outcome |
|----------------------------|------|-----------------|-----------------------------------|--------------|----------------------------------------------------------------|-----------------------------------------------------|-------------------------|--------------------------------------------------|-------------------------------------------------------|-------------------------------------------|
| Gandhi Bhatt <sup>97</sup> | 2021 | India           | Educational program               | Independent  | Doctors                                                        | Unspecified simulation modality                     | Surgery (Ophthalmology) | Yes                                              | Level 3                                               | Good                                      |
| Geldenhuys <sup>98</sup>   | 2020 | South Africa    | Broader intervention/initiative   | Independent  | Doctors                                                        | Unspecified simulation modality                     | Acute/critical care     | Partially                                        | Level 3                                               | Poor                                      |
| Gill <sup>67</sup>         | 2011 | Zambia          | Broader intervention/initiative   | Independent  | Traditional Birth Attendants                                   | Mannequin                                           | Neonatology             | Partially                                        | Level 3                                               | Some concerns                             |
| Goudar <sup>40</sup>       | 2013 | India           | Broader intervention/initiative   | Standardized | Unspecified health workers                                     | Scenario-based, Mannequin                           | Neonatology             | Partially                                        | Level 3                                               | Good                                      |
| Goudar <sup>99</sup>       | 2012 | India           | Broader intervention/initiative   | Standardized | Other, Nurse/midwives, Doctors                                 | Scenario-based, Mannequin                           | Neonatology             | Partially                                        | Level 2; Level 3                                      | Some concerns                             |
| Gueye <sup>100</sup>       | 2016 | Senegal         | Broader intervention/initiative   | Independent  | Nurses, Midwives, Unspecified health workers                   | Synthetic PTT                                       | Family planning         | NA                                               | Level 3                                               | Good                                      |
| Hands <sup>64</sup>        | 2020 | Sierra Leone    | Broader intervention/initiative   | Standardized | Doctors, Nurses                                                | Role-play                                           | Acute/critical care     | NA                                               | Level 3                                               | Fair                                      |
| Hashmi <sup>101</sup>      | 2013 | Pakistan        | Broader intervention/initiative   | Independent  | Doctors                                                        | Unspecified simulation modality                     | Acute/critical care     | Partially                                        | None                                                  | Fair                                      |
| Hawkins <sup>102</sup>     | 2021 | Botswana        | Broader intervention/initiative   | Independent  | Doctors, Nurses                                                | Role-play                                           | Family planning         | NA                                               | Level 1; Level 3                                      | Poor                                      |
| Houy <sup>103</sup>        | 2017 | Cambodia        | Educational program               | Independent  | Traditional Birth Attendants, Other, Midwives, Other           | Mannequin                                           | Neonatology; Obstetrics | Partially                                        | None                                                  | Fair                                      |
| Hu <sup>104</sup>          | 2016 | China           | Broader intervention/initiative   | Independent  | Unspecified health workers                                     | In-situ simulation, Unspecified simulation modality | Obstetrics              | Yes                                              | Level 3                                               | Fair                                      |
| Innerdal <sup>105</sup>    | 2020 | Mali            | Educational program               | Standardized | Unspecified health workers                                     | Scenario-based, Mannequin                           | Neonatology             | Partially                                        | Level 3                                               | Good                                      |
| Irimu <sup>66</sup>        | 2012 | Kenya           | Broader intervention/initiative   | Standardized | Unspecified health workers, Clinical Officers, Nurses, Doctors | Role-play, Scenario-based, Mannequin                | Acute/critical care     | NA                                               | Level 3                                               | Fair                                      |

**Supplement to:** Robinson SJA, Ritchie AMA, Pacilli M, Nestel D, McLeod E, Nataraja RM. Simulation-based education of health workers in low- and middle-income countries: a systematic review. *Glob Health Sci Pract.* 2024;12(6):e2400187. <https://doi.org/10.9745/GHSP-D-24-000187>

| Author                      | Year | Country/Setting              | Use of simulation-based education | Program Type | Learning Population/s                          | Simulation Modalities                                                                        | Educational Focus                                                 | Statistically Significant Improvement in Results | Kirkpatrick Levels Evaluated (in Addition to Level 4) | Risk of bias / Quality Assessment Outcome |
|-----------------------------|------|------------------------------|-----------------------------------|--------------|------------------------------------------------|----------------------------------------------------------------------------------------------|-------------------------------------------------------------------|--------------------------------------------------|-------------------------------------------------------|-------------------------------------------|
| Jones-Konneh <sup>106</sup> | 2017 | Sierra Leone                 | Educational program               | Independent  | Unspecified health workers                     | Simulated/standardized patients/participants, Scenario-based                                 | Infectious diseases                                               | NA                                               | None                                                  | Poor                                      |
| Jorro-Baron <sup>107</sup>  | 2021 | Argentina                    | Broader intervention/initiative   | Independent  | Unspecified health workers                     | Role-play                                                                                    | Communication/ leadership/ team training                          | No                                               | Level 2; Level 3                                      | Low                                       |
| Joudeh <sup>55</sup>        | 2021 | India                        | Educational program               | Standardized | Nurse/midwives                                 | Scenario-based, Mannequin, Synthetic PTT, Hybrid simulation, Unspecified simulation modality | Neonatology; Obstetrics; Communication/ leadership/ team training | Partially                                        | Level 3                                               | Fair                                      |
| Kamath-Rayne <sup>44</sup>  | 2017 | Honduras                     | Educational program               | Standardized | Doctors, Nurses                                | Scenario-based, Mannequin                                                                    | Neonatology                                                       | No                                               | Level 3                                               | Good                                      |
| Kestler <sup>108</sup>      | 2020 | Guatemala                    | Broader intervention/initiative   | Standardized | Unspecified health workers                     | Scenario-based, Mannequin, Synthetic PTT, Hybrid simulation, Unspecified simulation modality | Neonatology; Obstetrics; Communication/ leadership/ team training | No                                               | Level 3                                               | Low                                       |
| Matendo <sup>109</sup>      | 2011 | Democratic Republic of Congo | Broader intervention/initiative   | Standardized | Traditional Birth Attendants, Nurses, Midwives | Mannequin                                                                                    | Neonatology                                                       | Yes                                              | None                                                  | Low                                       |
| Michelangelo <sup>110</sup> | 2020 | Argentina                    | Educational program               | Independent  | Nurse/midwives, Allied health                  | Role-play, Scenario-based, Unspecified simulation modality                                   | Infectious diseases                                               | Yes                                              | Level 3                                               | Good                                      |
| Miller <sup>111</sup>       | 2012 | Pakistan                     | Educational program               | Independent  | Traditional Birth Attendants                   | Role-play, Mannequin                                                                         | Neonatology; Obstetrics                                           | Yes                                              | Level 2; Level 3                                      | Good                                      |

**Supplement to:** Robinson SJA, Ritchie AMA, Pacilli M, Nestel D, McLeod E, Nataraja RM. Simulation-based education of health workers in low- and middle-income countries: a systematic review. *Glob Health Sci Pract.* 2024;12(6):e2400187. <https://doi.org/10.9745/GHSP-D-24-000187>

| Author                       | Year | Country/Setting | Use of simulation-based education | Program Type | Learning Population/s                             | Simulation Modalities                               | Educational Focus   | Statistically Significant Improvement in Results | Kirkpatrick Levels Evaluated (in Addition to Level 4) | Risk of bias / Quality Assessment Outcome |
|------------------------------|------|-----------------|-----------------------------------|--------------|---------------------------------------------------|-----------------------------------------------------|---------------------|--------------------------------------------------|-------------------------------------------------------|-------------------------------------------|
| Mogilevkina <sup>112</sup>   | 2022 | Ukraine         | Educational program               | Standardized | Doctors, Midwives                                 | Mannequin                                           | Obstetrics          | Partially                                        | Level 3                                               | Moderate                                  |
| Molyneux <sup>65</sup>       | 2006 | Malawi          | Broader intervention/initiative   | Standardized | Unspecified health workers                        | Role-play                                           | Acute/critical care | NA                                               | Level 3                                               | Fair                                      |
| Mould-Millman <sup>113</sup> | 2019 | South Africa    | Educational program               | Independent  | Other                                             | In-situ simulation, Unspecified simulation modality | Acute/critical care | NA                                               | Level 1; Level 2; Level 3                             | Fair                                      |
| Mubeen <sup>114</sup>        | 2021 | Pakistan        | Educational program               | Standardized | Midwives                                          | Scenario-based, Mannequin                           | Neonatology         | No                                               | Level 3                                               | Good                                      |
| Mugore <sup>115</sup>        | 2016 | Togo            | Broader intervention/initiative   | Independent  | Nurses, Midwives                                  | Synthetic PTT                                       | Family planning     | NA                                               | Level 3                                               | Poor                                      |
| Mukhtar-Yola <sup>116</sup>  | 2018 | Nigeria         | Broader intervention/initiative   | Standardized | Doctors, Midwives                                 | Scenario-based, Mannequin                           | Neonatology         | NA                                               | Level 3                                               | Fair                                      |
| Muthamia <sup>117</sup>      | 2016 | Kenya           | Broader intervention/initiative   | Independent  | Unspecified health workers                        | Role-play, Synthetic PTT                            | Family planning     | Partially                                        | Level 3                                               | Fair                                      |
| Nataraja <sup>118</sup>      | 2022 | Myanmar         | Educational program               | Independent  | Doctors                                           | Scenario-based, Mannequin                           | Surgery             | Yes                                              | Level 1; Level 2; Level 3                             | Good                                      |
| Nelissen <sup>119</sup>      | 2017 | Tanzania        | Educational program               | Standardized | Unspecified health workers, Nurse/midwives, Other | Scenario-based, Synthetic PTT                       | Obstetrics          | Partially                                        | Level 1; Level 2; Level 3                             | Good                                      |
| Nevrekar <sup>120</sup>      | 2017 | India           | Educational program               | Independent  | Doctors                                           | Unspecified simulation modality                     | Acute/critical care | No                                               | Level 3                                               | Fair                                      |
| Nia <sup>121</sup>           | 2008 | Iran            | Broader intervention/initiative   | Independent  | Unspecified health workers, Other                 | Mannequin, Animal PTT                               | Acute/critical care | Yes                                              | Level 3                                               | Low                                       |
| O'Hare <sup>122</sup>        | 2006 | Uganda          | Broader intervention/initiative   | Independent  | Nurses                                            | Mannequin                                           | Neonatology         | Partially                                        | None                                                  | Fair                                      |
| Olson <sup>123</sup>         | 2012 | Indonesia       | Educational program               | Standardized | Doctors, Nurses, Midwives                         | Mannequin, Synthetic PTT                            | Neonatology         | No                                               | Level 2; Level 3                                      | Moderate                                  |
| Opiyo <sup>124</sup>         | 2008 | Kenya           | Educational program               | Standardized | Nurses, Midwives                                  | Mannequin                                           | Neonatology         | NA                                               | Level 3                                               | Some concerns                             |
| Paludo <sup>60</sup>         | 2021 | Brazil          | Educational program               | Independent  | Doctors                                           | Laparoscopic bench trainer, Extended reality        | Surgery (Urology)   | Partially                                        | Level 3                                               | Fair                                      |



**Supplement to:** Robinson SJA, Ritchie AMA, Pacilli M, Nestel D, McLeod E, Nataraja RM. Simulation-based education of health workers in low- and middle-income countries: a systematic review. *Glob Health Sci Pract.* 2024;12(6):e2400187. <https://doi.org/10.9745/GHSP-D-24-000187>

| Author                           | Year | Country/Setting                                                              | Use of simulation-based education | Program Type | Learning Population/s                               | Simulation Modalities                | Educational Focus                                             | Statistically Significant Improvement in Results | Kirkpatrick Levels Evaluated (in Addition to Level 4) | Risk of bias / Quality Assessment Outcome |
|----------------------------------|------|------------------------------------------------------------------------------|-----------------------------------|--------------|-----------------------------------------------------|--------------------------------------|---------------------------------------------------------------|--------------------------------------------------|-------------------------------------------------------|-------------------------------------------|
| Petroze <sup>125</sup>           | 2015 | Rwanda                                                                       | Educational program               | Standardized | Doctors, Nurses                                     | Unspecified simulation modality      | Acute/critical care; Communication/ leadership/ team training | Partially                                        | Level 3                                               | Poor                                      |
| Pleah <sup>126</sup>             | 2016 | 1. Benin<br>2. Chad<br>3. Côte d'Ivoire<br>4. Niger<br>5. Senegal<br>6. Togo | Educational program               | Independent  | Unspecified health workers                          | Synthetic PTT                        | Family planning                                               | NA                                               | Level 3                                               | Poor                                      |
| Puchalski Ritchie <sup>127</sup> | 2015 | Malawi                                                                       | Broader intervention/initiative   | Independent  | Nurses, Clinical Officers                           | Role-play                            | Infectious diseases                                           | No                                               | None                                                  | Low                                       |
| Rule <sup>43</sup>               | 2017 | Kenya                                                                        | Broader intervention/initiative   | Standardized | Unspecified health workers                          | Scenario-based, Mannequin            | Neonatology                                                   | Partially                                        | None                                                  | Good                                      |
| Schmidt <sup>128</sup>           | 2018 | Laos                                                                         | Educational program               | Independent  | Unspecified health workers                          | Mannequin                            | Neonatology                                                   | Partially                                        | None                                                  | Good                                      |
| Schnittger <sup>129</sup>        | 2011 | Malawi                                                                       | Educational program               | Independent  | Doctors, Nurses, Midwives, Clinical Officers, Other | Mannequin, Synthetic PTT, Animal PTT | Acute/critical care; Obstetrics                               | NA                                               | None                                                  | Fair                                      |
| Shahnazi <sup>130</sup>          | 2021 | Iran                                                                         | Broader intervention/initiative   | Independent  | Unspecified health workers                          | Role-play                            | Communication/ leadership/ team training                      | Yes                                              | Level 2; Level 3                                      | Moderate                                  |
| Shikuku <sup>131</sup>           | 2019 | Kenya                                                                        | Broader intervention/initiative   | Independent  | Midwives                                            | Mannequin, Synthetic PTT             | Obstetrics                                                    | Partially                                        | Level 3                                               | Moderate                                  |
| Spitzer <sup>132</sup>           | 2014 | Kenya                                                                        | Educational program               | Standardized | Unspecified health workers                          | Scenario-based, Mannequin            | Neonatology; Obstetrics                                       | Partially                                        | Level 3                                               | Fair                                      |
| Størdal <sup>47</sup>            | 2020 | Tanzania                                                                     | Educational program               | Standardized | Midwives                                            | Scenario-based, Mannequin            | Neonatology                                                   | Partially                                        | Level 3                                               | Fair                                      |
| Sunguya <sup>133</sup>           | 2017 | Tanzania                                                                     | Educational program               | Independent  | Unspecified health workers                          | Role-play                            | Other: Nutrition                                              | Yes                                              | Level 2; Level 3                                      | Some concerns                             |
| Tadesse <sup>134</sup>           | 2021 | Ethiopia                                                                     | Educational program               | Standardized | Nurses, Midwives                                    | Scenario-based                       | Neonatology                                                   | Partially                                        | Level 1; Level 2; Level 3                             | Fair                                      |
| Tilahun <sup>135</sup>           | 2017 | Ethiopia                                                                     | Broader intervention/initiative   | Independent  | Unspecified health workers                          | Synthetic PTT                        | Family planning                                               | NA                                               | Level 3                                               | Fair                                      |
| Tongprasert <sup>136</sup>       | 2010 | Thailand                                                                     | Educational program               | Independent  | Other                                               | Other: Mixed PTT                     | Obstetrics                                                    | No                                               | Level 3                                               | Good                                      |

**Supplement to:** Robinson SJA, Ritchie AMA, Pacilli M, Nestel D, McLeod E, Nataraja RM. Simulation-based education of health workers in low- and middle-income countries: a systematic review. *Glob Health Sci Pract.* 2024;12(6):e2400187. <https://doi.org/10.9745/GHSP-D-24-000187>

| Author                       | Year | Country/Setting                                                                                                                                                                                                                               | Use of simulation-based education | Program Type | Learning Population/s                | Simulation Modalities                            | Educational Focus       | Statistically Significant Improvement in Results | Kirkpatrick Levels Evaluated (in Addition to Level 4) | Risk of bias / Quality Assessment Outcome |
|------------------------------|------|-----------------------------------------------------------------------------------------------------------------------------------------------------------------------------------------------------------------------------------------------|-----------------------------------|--------------|--------------------------------------|--------------------------------------------------|-------------------------|--------------------------------------------------|-------------------------------------------------------|-------------------------------------------|
| Trevisanuto <sup>137</sup>   | 2015 | Mozambique                                                                                                                                                                                                                                    | Educational program               | Standardized | Midwives                             | Scenario-based, Mannequin                        | Neonatology             | No                                               | Level 3                                               | Good                                      |
| Ullrich <sup>138</sup>       | 2020 | Uganda                                                                                                                                                                                                                                        | Educational program               | Independent  | Doctors                              | Cadaveric PTT                                    | Surgery                 | No                                               | Level 1; Level 2; Level 3                             | Good                                      |
| Umunyana <sup>42</sup>       | 2020 | Rwanda                                                                                                                                                                                                                                        | Broader intervention/initiative   | Standardized | Unspecified health workers           | Scenario-based, Mannequin                        | Neonatology             | Partially                                        | Level 2; Level 3                                      | Good                                      |
| Van Den Broek <sup>139</sup> | 2019 | South Africa                                                                                                                                                                                                                                  | Educational program               | Standardized | Midwives, Unspecified health workers | Unspecified simulation modality                  | Neonatology; Obstetrics | No                                               | Level 3                                               | Some concerns                             |
| Van Heng <sup>140</sup>      | 2008 | Cambodia                                                                                                                                                                                                                                      | Educational program               | Independent  | Unspecified health workers           | Animal PTT                                       | Surgery                 | Yes                                              | Level 3                                               | Good                                      |
| Varghese <sup>141</sup>      | 2016 | India                                                                                                                                                                                                                                         | Educational program               | Independent  | Doctors, Nurses                      | Role-play, Scenario-based, Mannequin             | Neonatology; Obstetrics | No                                               | Level 1; Level 2; Level 3                             | Moderate                                  |
| Vossius <sup>41</sup>        | 2014 | Tanzania                                                                                                                                                                                                                                      | Educational program               | Standardized | Unspecified health workers           | Scenario-based, Mannequin                        | Neonatology             | Yes                                              | Level 1; Level 2; Level 3                             | Fair                                      |
| Vukoja <sup>62</sup>         | 2021 | 1. Bosnia and Herzegovina<br>2. China<br>3. Dominican Republic<br>4. India<br>5. Ireland<br>6. Lebanon<br>7. Mexico<br>8. Pakistan<br>9. Philippines<br>10. Poland<br>11. Saudi Arabia<br>12. Serbia<br>13. Tanzania<br>14. Turkey<br>15. USA | Broader intervention/initiative   | Independent  | Doctors, Unspecified health workers  | Telesimulation , Unspecified simulation modality | Acute/critical care     | Yes                                              | Level 3                                               | Poor                                      |

**Supplement to:** Robinson SJA, Ritchie AMA, Pacilli M, Nestel D, McLeod E, Nataraja RM. Simulation-based education of health workers in low- and middle-income countries: a systematic review. *Glob Health Sci Pract.* 2024;12(6):e2400187. <https://doi.org/10.9745/GHSP-D-24-000187>

| Author                | Year | Country/Setting       | Use of simulation-based education | Program Type | Learning Population/s              | Simulation Modalities                                                                                            | Educational Focus                                                 | Statistically Significant Improvement in Results | Kirkpatrick Levels Evaluated (in Addition to Level 4) | Risk of bias / Quality Assessment Outcome |
|-----------------------|------|-----------------------|-----------------------------------|--------------|------------------------------------|------------------------------------------------------------------------------------------------------------------|-------------------------------------------------------------------|--------------------------------------------------|-------------------------------------------------------|-------------------------------------------|
| Walker <sup>52</sup>  | 2016 | Mexico                | Educational program               | Standardized | Unspecified health workers         | Scenario-based, Mannequin, Synthetic PTT, Hybrid simulation, In-situ simulation, Unspecified simulation modality | Neonatology; Obstetrics; Communication/ leadership/ team training | Partially                                        | Level 3                                               | Fair                                      |
| Walker <sup>53</sup>  | 2020 | 1. Kenya<br>2. Uganda | Broader intervention/initiative   | Standardized | Unspecified health workers         | Scenario-based, Mannequin, Synthetic PTT, Hybrid simulation, In-situ simulation, Unspecified simulation modality | Neonatology; Obstetrics; Communication/ leadership/ team training | Yes                                              | Level 3                                               | Low                                       |
| Walton <sup>54</sup>  | 2016 | Guatemala             | Broader intervention/initiative   | Standardized | Unspecified health workers         | Scenario-based, Mannequin, Synthetic PTT, Hybrid simulation, In-situ simulation, Unspecified simulation modality | Neonatology; Obstetrics                                           | No                                               | Level 3                                               | Moderate                                  |
| Wang <sup>59</sup>    | 2010 | China                 | Educational program               | Standardized | Doctors, Nurses                    | Scenario-based, Unspecified simulation modality                                                                  | Acute/critical care                                               | Partially                                        | Level 3                                               | Poor                                      |
| Wendot <sup>142</sup> | 2018 | Kenya                 | Broader intervention/initiative   | Independent  | Doctors, Nurses, Clinical Officers | Role-play                                                                                                        | Family planning                                                   | Partially                                        | Level 3                                               | Good                                      |

**Supplement to:** Robinson SJA, Ritchie AMA, Pacilli M, Nestel D, McLeod E, Nataraja RM. Simulation-based education of health workers in low- and middle-income countries: a systematic review. *Glob Health Sci Pract.* 2024;12(6):e2400187. <https://doi.org/10.9745/GHSP-D-24-000187>

| Author                 | Year | Country/Setting | Use of simulation-based education | Program Type | Learning Population/s      | Simulation Modalities           | Educational Focus                        | Statistically Significant Improvement in Results | Kirkpatrick Levels Evaluated (in Addition to Level 4) | Risk of bias / Quality Assessment Outcome |
|------------------------|------|-----------------|-----------------------------------|--------------|----------------------------|---------------------------------|------------------------------------------|--------------------------------------------------|-------------------------------------------------------|-------------------------------------------|
| Willcox <sup>143</sup> | 2017 | Ghana           | Educational program               | Independent  | Midwives, Doctors, Nurses  | Unspecified simulation modality | Neonatology; Obstetrics                  | Yes                                              | None                                                  | Poor                                      |
| Wrarmert <sup>45</sup> | 2017 | Nepal           | Educational program               | Standardized | Doctors, Midwives          | Scenario-based, Mannequin       | Neonatology                              | Partially                                        | Level 3                                               | Good                                      |
| Xu <sup>144</sup>      | 2012 | China           | Educational program               | Standardized | Unspecified health workers | Mannequin                       | Neonatology                              | Yes                                              | Level 2                                               | Fair                                      |
| Xu <sup>145</sup>      | 2014 | China           | Educational program               | Standardized | Midwives, Doctors          | Mannequin                       | Neonatology                              | Partially                                        | Level 2; Level 3                                      | Good                                      |
| Yao <sup>146</sup>     | 2018 | China           | Educational program               | Standardized | Doctors, Nurses            | Scenario-based                  | Acute/critical care                      | No                                               | Level 2; Level 3                                      | Fair                                      |
| Zaman <sup>147</sup>   | 2008 | Pakistan        | Educational program               | Standardized | Other                      | Role-play, Scenario-based       | Communication/ leadership/ team training | Partially                                        | Level 3                                               | Low                                       |

^PTT = Part-task trainer

## References of included studies:

40. Goudar SS, Somannavar MS, Clark R, et al. Stillbirth and newborn mortality in India after helping babies breathe training. *Pediatrics.* 2013;131(2):e344-e352. [CrossRef](#). [Medline](#)
41. Vossius C, Lotto E, Lyanga S, et al. Cost-effectiveness of the "helping babies breathe" program in a missionary hospital in rural Tanzania. *PLoS One.* 2014;9(7):e102080. [CrossRef](#). [Medline](#)
42. Umunyana J, Sayinzoga F, Ricca J, et al. A practice improvement package at scale to improve management of birth asphyxia in Rwanda: a before-after mixed methods evaluation. *BMC Pregnancy Childbirth.* 2020;20(1):583. [CrossRef](#). [Medline](#)
43. Rule ARL, Maina E, Cheruiyot D, et al. Using quality improvement to decrease birth asphyxia rates after 'Helping Babies Breathe' training in Kenya. *Acta Paediatr.* 2017;106(10):1666-1673. [CrossRef](#). [Medline](#)
44. Kamath-Rayne BD, Josyula S, Rule ARL, Vasquez JC. Improvements in the delivery of resuscitation and newborn care after Helping Babies Breathe training. *J Perinatol.* 2017;37(10):1153-1160. [CrossRef](#). [Medline](#)
45. Wrarmert J, Kc A, Ewald U, Målqvist M. Improved postnatal care is needed to maintain gains in neonatal survival after the implementation of the Helping Babies Breathe initiative. *Acta Paediatr.* 2017;106(8):1280-1285. [CrossRef](#). [Medline](#)
47. Størdal K, Eilevstjonn J, Mduma E, et al. Increased perinatal survival and improved ventilation skills over a five-year period: an observational study. *PLoS One.* 2020;15(10):e0240520. [CrossRef](#). [Medline](#)

**Supplement to:** Robinson SJA, Ritchie AMA, Pacilli M, Nestel D, McLeod E, Nataraja RM. Simulation-based education of health workers in low- and middle-income countries: a systematic review. *Glob Health Sci Pract.* 2024;12(6):e2400187. <https://doi.org/10.9745/GHSP-D-24-000187>

48. Bellad RM, Bang A, Carlo WA, et al. A pre-post study of a multi-country scale up of resuscitation training of facility birth attendants: does Helping Babies Breathe training save lives? *BMC Pregnancy Childbirth.* 2016;16(1):222. [CrossRef](#). [Medline](#)
51. Afulani PA, Aborigo RA, Walker D, et al. Can an integrated obstetric emergency simulation training improve respectful maternity care? Results from a pilot study in Ghana. *Birth.* 2019;46(3):523-532. [CrossRef](#). [Medline](#)
52. Walker DM, Cohen SR, Fritz J, et al. Impact evaluation of PRONTO Mexico: a simulation-based program in obstetric and neonatal emergencies and team training. *Simul Healthc.* 2016;11(1):1-9. [CrossRef](#). [Medline](#)
53. Walker D, Otieno P, Butrick E, et al. Effect of a quality improvement package for intrapartum and immediate newborn care on fresh stillbirth and neonatal mortality among preterm and low-birthweight babies in Kenya and Uganda: a cluster-randomised facility-based trial. *Lancet Glob Health.* 2020;8(8):e1061-e1070. [CrossRef](#). [Medline](#)
54. Walton A, Kestler E, Dettinger JC, et al. Impact of a low-technology simulation-based obstetric and newborn care training scheme on non-emergency delivery practices in Guatemala. *Int J Gynaecol Obstet.* 2016;132(3):359-364. [CrossRef](#). [Medline](#)
55. Joudeh A, Ghosh R, Spindler H, et al. Increases in diagnosis and management of obstetric and neonatal complications in district hospitals during a high intensity nurse-mentoring program in Bihar, India. *PLoS One.* 2021;16(3):e0247260. [CrossRef](#). [Medline](#)
56. Egenberg S, Masenga G, Bru LE, et al. Impact of multi-professional, scenario-based training on postpartum hemorrhage in Tanzania: a quasi-experimental, pre- vs. post-intervention study. *BMC Pregnancy Childbirth.* 2017;17(1):287. [CrossRef](#). [Medline](#)
57. Crofts JF, Mukuli T, Murove BT, et al. Onsite training of doctors, midwives and nurses in obstetric emergencies, Zimbabwe. *Bull World Health Organ.* 2015;93(5):347-51. [CrossRef](#). [Medline](#)
58. Dresang LT, Gonzalez MMA, Beasley J, et al. The impact of Advanced Life Support in Obstetrics (ALSO) training in low-resource countries. *Int J Gynaecol Obstet.* 2015;131(2):209-215. [CrossRef](#). [Medline](#)
59. Wang P, Li NP, Gu YF, et al. Comparison of severe trauma care effect before and after advanced trauma life support training. *Chin J Traumatol.* 2010;13(6):341-4. [Medline](#)
60. Paludo AO, Knijnik P, Brum P, et al. Urology residents simulation training improves clinical outcomes in laparoscopic partial nephrectomy. *J Surg Educ.* 2021;78(5):1725-1734. [CrossRef](#). [Medline](#)
61. Dean WH, Gichuhi S, Buchan JC, et al. Intense simulation-based surgical education for manual small-incision cataract surgery: the ophthalmic learning and improvement initiative in cataract surgery randomized clinical trial in Kenya, Tanzania, Uganda, and Zimbabwe. *JAMA Ophthalmol.* 2021;139(1):9-15. [CrossRef](#). [Medline](#)
62. Vukoja M, Dong Y, Adhikari NKJ, et al. Checklist for early recognition and treatment of acute illness and injury: an exploratory multicenter international quality-improvement study in the ICUs with variable resources. *Crit Care Med.* 2021;49(6):e598-e612. [CrossRef](#). [Medline](#)
63. Chan BT, Rauscher C, Issina AM, et al. A programme to improve quality of care for patients with chronic diseases, Kazakhstan. *Bull World Health Organ.* 2020;98(3):161-169. [CrossRef](#). [Medline](#)

**Supplement to:** Robinson SJA, Ritchie AMA, Pacilli M, Nestel D, McLeod E, Nataraja RM. Simulation-based education of health workers in low- and middle-income countries: a systematic review. *Glob Health Sci Pract.* 2024;12(6):e2400187. <https://doi.org/10.9745/GHSP-D-24-000187>

64. Hands S, Verriotis M, Mustapha A, et al. Nurse-led implementation of ETAT+ is associated with reduced mortality in a children's hospital in Freetown, Sierra Leone. *Paediatr Int Child Health.* 2020;40(3):186-193. [CrossRef](#). [Medline](#)
65. Molyneux E, Ahmad S, Robertson A. Improved triage and emergency care for children reduces inpatient mortality in a resource-constrained setting. *Bull World Health Organ.* 2006;84(4):314-9. [CrossRef](#). [Medline](#)
66. Irimu GW, Gathara D, Zurovac D, et al. Performance of health workers in the management of seriously sick children at a Kenyan tertiary hospital: before and after a training intervention. *PLoS One.* 2012;7(7):e39964. [CrossRef](#). [Medline](#)
67. Gill CJ, Phiri-Mazala G, Guerina NG, et al. Effect of training traditional birth attendants on neonatal mortality (Lufwanyama Neonatal Survival Project): randomised controlled study. *BMJ.* 2011;342:d346. [CrossRef](#). [Medline](#)
76. Arabi AME, Ibrahim SA, Manar AR, et al. Perinatal outcomes following Helping Babies Breathe training and regular peer-peer skills practice among village midwives in Sudan. *Arch Dis Child.* 2018;103(1):24-27. [CrossRef](#). [Medline](#)
77. Arreola-Risa C, Mock C, Herrera-Escamilla AJ, et al. Cost-effectiveness and benefit of alternatives to improve training for prehospital trauma care in Mexico. *Prehosp Disaster Med.* 2004;19(4):318-325. [CrossRef](#). [Medline](#)
78. Aziz K, Ma X, Lockyer J, et al. An evaluation of Acute Care of at-Risk Newborns (ACoRN), a Canadian education program, in Chinese neonatal nurseries. *Paediatr Child Health.* 2020;25(6):351-357. [CrossRef](#). [Medline](#)
79. Baumgartner JN, Headley J, Kirya J, et al. Impact evaluation of a maternal and neonatal health training intervention in private Ugandan facilities. *Health Policy Plan.* 2021;36(7):1103-1115. [CrossRef](#). [Medline](#)
80. Bender GJ, Kennally K. Implementing a neonatal transport system with simulation in Kosovo. *Air Med J.* 2016;35(3):126-131. [CrossRef](#). [Medline](#)
81. Brathwaite KP, Bryce F, Moyer LB, et al. Evaluation of two newborn resuscitation training strategies in regional hospitals in Ghana. *Resusc Plus.* 2020;1-2:100001. [CrossRef](#). [Medline](#)
82. Carlo WA, Goudar SS, Jehan I, et al. Newborn-care training and perinatal mortality in developing countries. *N Engl J Med.* 2010;362(7):614-23. [CrossRef](#). [Medline](#)
83. Carvalho VS, Jr., Picanco MR, Volschan A, et al. Impact of simulation training on a telestroke network. *Int J Stroke.* 2019;14(5):500-507. [CrossRef](#). [Medline](#)
84. Chang OH, Levy B, Lytle H, et al. Implementation of the alliance for innovation on maternal health program to reduce maternal mortality in Malawi. *Obstet Gynecol.* 2019;133(3):507-514. [CrossRef](#). [Medline](#)
85. Charafeddine L, Badran M, Nakad P, et al. Strategic assessment of implementation of neonatal resuscitation training at a national level. *Pediatr Int.* 2016;58(7):595-600. [CrossRef](#). [Medline](#)
86. Charyeva Z, Oguntunde O, Orobato N, et al. Task shifting provision of contraceptive implants to community health extension workers: results of operations research in Northern Nigeria. *Glob Health Sci Pract.* 2015;3(3):382-394. [CrossRef](#). [Medline](#)

**Supplement to:** Robinson SJA, Ritchie AMA, Pacilli M, Nestel D, McLeod E, Nataraja RM. Simulation-based education of health workers in low- and middle-income countries: a systematic review. *Glob Health Sci Pract.* 2024;12(6):e2400187. <https://doi.org/10.9745/GHSP-D-24-000187>

87. Cioe-Pena EC, Granados JC, Wrightsmith LL, et al. Development and implementation of a hospital-based trauma response system in an urban hospital in San Salvador, El Salvador. *Trauma.* 2017;19(2):118-126. [CrossRef](#)
88. Clark M, Spry E, Daoh K, et al. Reductions in inpatient mortality following interventions to improve emergency hospital care in Freetown, Sierra Leone. *PLoS One.* 2012;7(9):e41458. [CrossRef](#). [Medline](#)
89. Cummings MJ, Goldberg E, Mwaka S, et al. A complex intervention to improve implementation of World Health Organization guidelines for diagnosis of severe illness in low-income settings: a quasi-experimental study from Uganda. *Implement Sci.* 2017;12(1):126. [CrossRef](#). [Medline](#)
90. Das R, Farzana FD, Sultana Z, et al. Evaluation of SIMESON, a training program to improve access to quality health care for pregnant women and newborn in different healthcare facilities of northern Bangladesh. *Nurs Open.* 2022;9(1):801-815. [CrossRef](#). [Medline](#)
91. Das MK, Chaudhary C, Kaushal SK, et al. Impact of neonatal resuscitation capacity building of birth attendants on stillbirth rate at public health facilities in Uttar Pradesh, India. *Indian Pediatr.* 2019;56(5):369-373. [Medline](#)
92. de Melo BCP, Van der Vleuten CPM, Muijtjens AMM, et al. Effects of an in situ instructional design based postpartum hemorrhage simulation training on patient outcomes: an uncontrolled before-and-after study. *J Matern Fetal Neonatal Med.* 2021;34(2):245-252. [CrossRef](#). [Medline](#)
93. Dumont A, Fournier P, Abrahamowicz M, et al. Quality of care, risk management, and technology in obstetrics to reduce hospital-based maternal mortality in Senegal and Mali (QUARITE): a cluster-randomised trial. *Lancet.* 2013;382(9887):146-57. [CrossRef](#). [Medline](#)
94. Ellard DR, Shemdoe A, Mazuguni F, et al. Can training non-physician clinicians/associate clinicians (NPCs/ACs) in emergency obstetric, neonatal care and clinical leadership make a difference to practice and help towards reductions in maternal and neonatal mortality in rural Tanzania? The ETATMBA project. *BMJ Open.* 2016;6(2):e008999. [CrossRef](#). [Medline](#)
95. Evans CL, Bazant E, Atukunda I, et al. Peer-assisted learning after onsite, low-dose, high-frequency training and practice on simulators to prevent and treat postpartum hemorrhage and neonatal asphyxia: a pragmatic trial in 12 districts in Uganda. *PLoS One.* 2018;13(12):e0207909. [CrossRef](#). [Medline](#)
96. Fikree FF, Zerihun H. Scaling up a strengthened youth-friendly service delivery model to include long-acting reversible contraceptives in Ethiopia: a mixed methods retrospective assessment. *Int J Health Policy Manag.* 2020;9(2):53-64. [CrossRef](#). [Medline](#)
97. Gandhi Bhatt A, Dole KS, Deshpande M, et al. Impact of a structured training program to enhance skills in phacoemulsification surgery. *Indian J Ophthalmol.* 2021;69(12):3697-3702. [CrossRef](#). [Medline](#)
98. Geldenhuis L, Wise R, Rodseth R. The impact of a bundled intrahospital transfer protocol on the safety of critically ill patients in a South African metropolitan hospital system. *Southern Afr J Anaesthesia Analgesia.* 2020;26(3):139-148. [CrossRef](#)
99. Goudar SS, Dhaded SM, McClure EM, et al. ENC training reduces perinatal mortality in Karnataka, India. *J Matern Fetal Neonatal Med.* 2012;25(6):568-74. [CrossRef](#). [Medline](#)
100. Gueye B, Wesson J, Koumtingue D, et al. Mentoring, Task sharing, and community outreach through the TutoratPlus approach: increasing use of long-acting reversible contraceptives in Senegal. *Glob Health Sci Pract.* 2016;4(Suppl 2):S33-S43. [CrossRef](#). [Medline](#)

**Supplement to:** Robinson SJA, Ritchie AMA, Pacilli M, Nestel D, McLeod E, Nataraja RM. Simulation-based education of health workers in low- and middle-income countries: a systematic review. *Glob Health Sci Pract.* 2024;12(6):e2400187. <https://doi.org/10.9745/GHSP-D-24-000187>

101. Hashmi ZG, Haider AH, Zafar SN, et al. Hospital-based trauma quality improvement initiatives: first step toward improving trauma outcomes in the developing world. *J Trauma Acute Care Surg.* 2013;75(1):60-68. [CrossRef](#). [Medline](#)
102. Hawkins L, Gertz AM, Badubi O, et al. Integration of family planning services into health care for HIV-positive women in Botswana. *Int J Gynaecol Obstet.* 2021;152(2):208-214. [CrossRef](#). [Medline](#)
103. Houy C, Ha SO, Steinholt M, et al. Delivery as trauma: a prospective time-cohort study of maternal and perinatal mortality in rural Cambodia. *Prehosp Disaster Med.* 2017;32(2):180-186. [CrossRef](#). [Medline](#)
104. Hu LQ, Flood P, Li Y, et al. No pain labor & delivery: a global health initiative's impact on clinical outcomes in China. *Anesth Analg.* 2016;122(6):1931-8. [CrossRef](#). [Medline](#)
105. Innerdal M, Simaga I, Diall H, et al. Reduction in perinatal mortality after implementation of HBB training at a district hospital in Mali. *J Trop Pediatr.* 2020;66(3):315-321. [CrossRef](#). [Medline](#)
106. Jones-Konneh TEC, Murakami A, Sasaki H, et al. Intensive education of health care workers improves the outcome of Ebola virus disease: lessons learned from the 2014 outbreak in Sierra Leone. *Tohoku J Exp Med.* 2017;243(2):101-105. [CrossRef](#). [Medline](#)
107. Jorro-Baron F, Suarez-Anzorena I, Burgos-Pratx R, et al. Handoff improvement and adverse event reduction program implementation in paediatric intensive care units in Argentina: a stepped-wedge trial. *BMJ Quality & Safety.* 2021;30(10):782-791. [CrossRef](#). [Medline](#)
108. Kestler E, Ambrosio G, Hemming K, et al. An integrated approach to improve maternal and perinatal outcomes in rural Guatemala: a stepped-wedge cluster randomized trial. *Int J Gynaecol Obstet.* 2020;151(1):109-116. [CrossRef](#). [Medline](#)
109. Matendo R, Engmann C, Ditekemena J, et al. Reduced perinatal mortality following enhanced training of birth attendants in the Democratic Republic of Congo: a time-dependent effect. *BMC Med.* 2011;9:93. [CrossRef](#). [Medline](#)
110. Michelangelo H, Angriman F, Pizarro R, et al. Implementation of an experiential learning strategy to reduce the risk of ventilator-associated pneumonia in critically ill adult patients. *J Intensive Care Soc.* 2020;21(4):320-326. [CrossRef](#). [Medline](#)
111. Miller PC, Rashida G, Tasneem Z, et al. The effect of traditional birth attendant training on maternal and neonatal care. *Int J Gynaecol Obstet.* 2012;117(2):148-52. [CrossRef](#). [Medline](#)
112. Mogilevkina I, Gurianov V, Lindmark G. Effectiveness of emergency obstetric care training at the regional level in Ukraine: a non-randomized controlled trial. *BMC Pregnancy Childbirth.* 2022;22(1):145. [CrossRef](#). [Medline](#)
113. Mould-Millman NK, Dixon J, Lamp A, et al. A single-site pilot implementation of a novel trauma training program for prehospital providers in a resource-limited setting. *Pilot Feasibility Stud.* 2019;5(1):143. [CrossRef](#). [Medline](#)
114. Mubeen K, Baig M, Abbas S, et al. Helping babies breathe: assessing the effectiveness of simulation-based high-frequency recurring training in a community-based setting of Pakistan. *BMC Pediatr.* 2021;21(1):555. [CrossRef](#). [Medline](#)
115. Mugore S, Kassouta NT, Sebikali B, et al. Improving the quality of postabortion care services in Togo increased uptake of contraception. *Glob Health Sci Pract.* 2016;4(3):495-505. [CrossRef](#). [Medline](#)



**Supplement to:** Robinson SJA, Ritchie AMA, Pacilli M, Nestel D, McLeod E, Nataraja RM. Simulation-based education of health workers in low- and middle-income countries: a systematic review. *Glob Health Sci Pract.* 2024;12(6):e2400187. <https://doi.org/10.9745/GHSP-D-24-000187>

116. Mukhtar-Yola M, Audu LI, Olaniyan O, et al. Decreasing birth asphyxia: utility of statistical process control in a low-resource setting. *BMJ Open Quality.* 2018;7 (3) (e000231):(no pagination). [CrossRef](#). [Medline](#)
117. Muthamia M, Owino K, Nyachae P, et al. The Tupange project in Kenya: a multifaceted approach to increasing use of long-acting reversible contraceptives. *Glob Health Sci Pract.* 2016;4(Suppl 2):S44-S59. [CrossRef](#). [Medline](#)
118. Nataraja RM, Yin Mar O, Ljuhar D, et al. Long-term impact of a low-cost paediatric intussusception air enema reduction simulation-based education programme in a low-middle income country. *World J Surg.* 2022;46(2):310-321. [CrossRef](#). [Medline](#)
119. Nelissen E, Ersdal H, Mduma E, et al. Clinical performance and patient outcome after simulation-based training in prevention and management of postpartum haemorrhage: an educational intervention study in a low-resource setting. *BMC Pregnancy Childbirth.* 2017;17(1):301. [CrossRef](#). [Medline](#)
120. Nevrekar V, Panda PK, Wig N, et al. An interventional quality improvement study to assess the compliance to cardiopulmonary resuscitation documentation in an Indian teaching hospital. *Indian J Crit Care Med.* 2017;21(11):758-764. [CrossRef](#). [Medline](#)
121. Nia MS, Naffisi N, Mohebbi HA, et al. The role of performing life support courses in rural areas in improving pre-hospital physiologic conditions of patients with penetrating injuries. *J Coll Physicians Surg Pak.* 2008;18(9):538-541. [Medline](#)
122. O'Hare BA, Nakakeeto M, Southall DP. A pilot study to determine if nurses trained in basic neonatal resuscitation would impact the outcome of neonates delivered in Kampala, Uganda. *J Trop Pediatr.* 2006;52(5):376-9. [CrossRef](#). [Medline](#)
123. Olson KR, Caldwell A, Sihombing M, et al. Community-based newborn resuscitation among frontline providers in a low-resource country. *Int J Gynaecol Obstet.* 2012;119(3):244-7. [CrossRef](#). [Medline](#)
124. Opiyo N, Were F, Govedi F, et al. Effect of newborn resuscitation training on health worker practices in Pumwani Hospital, Kenya. *PLoS One.* 2008;3(2):e1599. [CrossRef](#). [Medline](#)
125. Petroze RT, Byiringiro JC, Ntakiyiruta G, et al. Can focused trauma education initiatives reduce mortality or improve resource utilization in a low-resource setting? *World J Surg.* 2015;39(4):926-33. [CrossRef](#). [Medline](#)
126. Pleah T, Hyjazi Y, Austin S, et al. Increasing use of postpartum family planning and the postpartum IUD: early experiences in West and Central Africa. *Glob Health Sci Pract.* 2016;4(Suppl 2):S140-S152. [CrossRef](#). [Medline](#)
127. Puchalski Ritchie LM, Schull MJ, Martiniuk AL, et al. A knowledge translation intervention to improve tuberculosis care and outcomes in Malawi: a pragmatic cluster randomized controlled trial. *Implement Sci.* 2015;10:38. [CrossRef](#). [Medline](#)
128. Schmidt S, Bounnack S, Hoehn T. Neonatal mortality and morbidity in the post-implementation period of a neonatal teaching program in provincial hospitals in Laos. *Public Health.* 2018;154:123-129. [CrossRef](#). [Medline](#)
129. Schnittger T, Downie P, Pollach G. The effect of providing resuscitation training to frontline staff on rates of maternal and trauma mortality in two health districts in Malawi. *Malawi Med J.* 2011;23(1):11-5. [CrossRef](#). [Medline](#)
130. Shahnazi H, Araban M, Karimy M, et al. A quasi-experimental study to improve health service quality: implementing communication and self-efficacy skills training to primary healthcare workers in two counties in Iran. *BMC Med Educ.* 2021;21(1):369. [CrossRef](#). [Medline](#)

**Supplement to:** Robinson SJA, Ritchie AMA, Pacilli M, Nestel D, McLeod E, Nataraja RM. Simulation-based education of health workers in low- and middle-income countries: a systematic review. *Glob Health Sci Pract.* 2024;12(6):e2400187. <https://doi.org/10.9745/GHSP-D-24-000187>

131. Shikuku DN, Mukosa R, Peru T, et al. Reducing intrapartum fetal deaths through low-dose high frequency clinical mentorship in a rural hospital in Western Kenya: a quasi-experimental study. *BMC Pregnancy Childbirth.* 2019;19(1):518. [CrossRef](#). [Medline](#)
132. Spitzer RF, Steele SJ, Caloia D, et al. One-year evaluation of the impact of an emergency obstetric and neonatal care training program in Western Kenya. *Int J Gynaecol Obstet.* 2014;127(2):189-93. [CrossRef](#). [Medline](#)
133. Sunguya BF, Mlunde LB, Urassa DP, et al. Improving feeding and growth of HIV-positive children through nutrition training of frontline health workers in Tanga, Tanzania. *BMC Pediatr.* 2017;17(1):94. [CrossRef](#). [Medline](#)
134. Tadesse M, Hally S, Rent S, et al. Effect of a low-dose/high-frequency training in introducing a nurse-led neonatal advanced life support service in a referral hospital in Ethiopia. *Front Pediatr.* 2021;9:777978. [CrossRef](#). [Medline](#)
135. Tilahun Y, Lew C, Belayihun B, et al. Improving contraceptive access, use, and method mix by task sharing implanon insertion to frontline health workers: the experience of the integrated family health program in Ethiopia. *Glob Health Sci Pract.* 2017;5(4):592-602. [CrossRef](#). [Medline](#)
136. Tongprasert F, Wanapirak C, Sirichotiyakul S, et al. Training in cordocentesis: the first 50 case experience with and without a cordocentesis training model. *Prenatal Diagnosis.* 2010;30(5):467-70. [CrossRef](#). [Medline](#)
137. Trevisanuto D, Bertuola F, Lanzoni P, et al. Effect of a neonatal resuscitation course on healthcare providers' performances assessed by video recording in a low-resource setting. *PLoS One.* 2015;10(12):e0144443. [CrossRef](#). [Medline](#)
138. Ullrich SJ, DeWane MP, Cheung M, et al. Development of an operative trauma course in Uganda-a report of a three-year experience. *J Surg Res.* 2020;256:520-527. [CrossRef](#). [Medline](#)
139. Van Den Broek N, Ameh C, Madaj B, et al. Effects of emergency obstetric care training on maternal and perinatal outcomes: a stepped wedge cluster randomised trial in South Africa. *BMJ Global Health.* 2019;4(6):e001670. [CrossRef](#). [Medline](#)
140. Van Heng Y, Davoung C, Husum H. Non-doctors as trauma surgeons? A controlled study of trauma training for non-graduate surgeons in rural Cambodia. *Prehosp Disaster Med.* 2008;23(6):483-489. [CrossRef](#). [Medline](#)
141. Varghese B, Krishnamurthy J, Correia B, et al. Limited effectiveness of a skills and drills intervention to improve emergency obstetric and newborn care in Karnataka, India: a proof-of-concept study. *Glob Health Sci Pract.* 2016;4(4):582-593. [CrossRef](#). [Medline](#)
142. Wendot S, Scott RH, Nafula I, et al. Evaluating the impact of a quality management intervention on post-abortion contraceptive uptake in private sector clinics in Western Kenya: a pre- and post-intervention study. *Reprod Health.* 2018;15(1):10. [CrossRef](#). [Medline](#)
143. Willcox M, Harrison H, Asiedu A, et al. Incremental cost and cost-effectiveness of low-dose, high-frequency training in basic emergency obstetric and newborn care as compared to status quo: part of a cluster-randomized training intervention evaluation in Ghana. *Global Health.* 2017;13(1):88. [CrossRef](#). [Medline](#)
144. Xu T, Wang HS, Ye HM, et al. Impact of a nationwide training program for neonatal resuscitation in China. *Chin Med J.* 2012;125(8):1448-1456. [Medline](#)
145. Xu T, Wang H, Gong L, et al. The impact of an intervention package promoting effective neonatal resuscitation training in rural China. *Resuscitation.* 2014;85(2):253-259. [CrossRef](#). [Medline](#)

**Supplement to:** Robinson SJA, Ritchie AMA, Pacilli M, Nestel D, McLeod E, Nataraja RM. Simulation-based education of health workers in low- and middle-income countries: a systematic review. *Glob Health Sci Pract.* 2024;12(6):e2400187. <https://doi.org/10.9745/GHSP-D-24-000187>

146. Yao JL, Zhou CX, Fu JM, et al. A survey on the epidemiology of trauma and China trauma care training in subtropical regions of Hainan Province. *J Acute Dis.* 2018;7(3):108-114. [CrossRef](#)

147. Zaman S, Ashraf RN, Martines J. Training in complementary feeding counselling of healthcare workers and its influence on maternal behaviours and child growth: a cluster-randomized controlled trial in Lahore, Pakistan. *J Health Pop Nutr.* 2008;26(2):210-222. [Medline](#)
